# Supplementary material for: High-frequency terahertz stimulation alleviates neuropathic pain by inhibiting the pyramidal neuron activity in the anterior cingulate cortex of mice
Source: eLife journal article supplement (doi:10.7554/elife.97444), 2024-04-26
Supplement: fig4-data1 [file ALL_FIRING RATE.xlsx]

## Sheet: Sheet1
Sham-Pre-HFTS	Sham-Post-HFTS	SNI-Pre-HFTS	SNI-Post-HFTS
2.1258	4.0139	3.34433	3.87508
1.1329	1.7782	1.13828	3.24599
3.5236	4.7534	1.61447	3.77487
2.4952	3.9852	1.67024	3.22344
6.0793	7.3229	2.24961	3.93679
4.7613	7.3489	1.97736	3.84021
2.4415	2.2227	1.50656	3.67994
10.0419	8.1523	7.5251	5.94517
2.1987	1.5478	9.50708	11.2618
1.9851	1.8007	5.1161	5.61154
1.5149	1.6928	10.6469	11.2195
6.5349	5.943	7.31225	8.32887
2.9618	2.0074	10.7729	11.5368
3.0324	3.3585	10.0395	11.2282
9.5043	8.6194	11.5993	12.0734
9.0914	8.6546	4.65311	6.51618
8.7152	8.4524	6.90899	9.24825
8.707	8.0406	11.1179	12.3114
2.98	1.1734	3.42309	3.80336
3.0546	1.4784	5.41123	5.97806
3.7021	3.2267	1.386	1.72711
5.7869	1.7118	4.2097	6.17606
5.4266	1.7982	4.61417	5.17847
5.9834	4.2288	5.93175	6.82682
5.7618	5.0934	3.56829	4.02248
4.301	1.9306	2.66112	3.75912
1.8693	1.0028	8.84292	9.60228
2.7557	1.9453	1.93296	4.04724
7.466	3.1771	10.1495	9.8946
4.8214	2.6574	9.89628	9.6708
7.6896	6.3056	8.70516	8.81376
6.7957	2.1799	2.84544	2.75736
3.7079	2.0107	5.09832	5.49744
3.4493	1.5496	2.67924	2.81136
5.6982	4.9645	3.63516	3.36612
7.5331	5.8274	7.81344	7.06728
6.2269	3.8784	4.98288	5.13384
2.6287	1.3123	9.8154	10.3463
7.5086	3.3249	7.68492	7.37448
2.4756	2.0689	12.3796	11.9557
13.9288	9.806	3.83244	4.22952
11.1934	5.898	6.61248	6.22632
3.0435	1.9746	2.77944	2.61696
2.9369	2.1361	5.2506	5.07756
1.8251	1.1037	6.06552	5.6562
8.1637	4.7742	3.291	2.99088
7.146	3.4281	4.00692	4.0728
9.2737	3.9149	2.49684	1.61184
3.8146	2.6134	2.74704	1.39572
8.1439	2.1816	2.67756	1.32204
2.4256	1.0435	2.05656	1.20108
4.8539	2.028	2.27088	1.70088
3.9834	3.1598	4.69896	2.09316
8.0362	6.2712	10.0717	5.37144
4.4626	3.3928	2.41404	1.21356
3.3104	1.0302	5.87568	2.78952
5.4194	2.2474	2.8242	2.24892
4.2029	2.8674	6.83844	3.12732
6.0226	2.2265	6.09732	4.5528
2.7292	1.4714	9.59796	8.55888
2.0588	1.6232	7.43772	1.93584
3.4467	2.6168	4.68888	3.14268
7.3114	3.2025	2.76912	2.10648
6.2224	3.7885	2.92584	1.24764
3.5821	1.008	4.64052	1.24332
6.6831	12.2081	9.42792	4.30572
4.5149	4.1301	7.49088	3.14496
3.1019	2.6726	8.86824	2.24448
6.329	4.3581	3.09864	1.2402
4.4691	1.5173	7.79304	4.65756
5.5341	3.2286	2.538	1.24572
8.6639	6.6631	3.64572	2.19
8.6879	1.7775	5.14488	2.69496
		11.8739	11.4872
		6.97008	5.4546
		10.1186	9.2988
		7.07592	5.82204
		4.27212	3.51708
		3.03588	2.634
		9.71772	5.70264
		4.5264	3.7572
		8.74032	5.45232
		3.03924	2.04684
		6.62316	3.28236
		5.90088	5.19216
		12.5796	11.5272
		8.96736	4.2
		4.39368	3.14088
		10.056	7.24476
		5.67564	2.2692
		10.0343	9.01404
		10.9387	7.58988
		6.27228	3.13608
		6.33588	4.6854
		8.08008	4.69872
		3.6996	1.77996
		12.5767	9.22548
		11.2566	8.80596
		11.4412	8.06604
		6.36756	4.88916
		12.2152	7.36416
		3.71364	2.349
		4.85328	1.40376
		3.00756	2.22192
		4.46928	2.04384
		9.65616	4.82172
		9.86232	6.53532
		3.12552	1.68456
		4.79364	2.16732
		5.48208	2.7252
		8.56272	5.03172
		4.17876	3.23928
		9.47472	3.82848
		3.77136	2.97288
		5.81424	3.43776
		4.1748	1.67604
		6.34008	4.97244
		2.07696	1.296
		4.25136	2.24244
		4.05144	2.631
		7.95168	6.95988
		4.30572	3.0606
		8.00376	4.71492
		4.34364	4.75272
		2.73228	1.9818
		9.37836	7.2306
		3.0186	1.25592
		13.2446	11.6667
		3.98304	2.95404
		4.368	3.31104
