# Supplementary material for: High-frequency terahertz stimulation alleviates neuropathic pain by inhibiting the pyramidal neuron activity in the anterior cingulate cortex of mice
Source: eLife journal article supplement (doi:10.7554/elife.97444), 2024-04-26
Supplement: fig4-data1 [file elife-97444-fig4-data1-v1.zip]

## Sheet: Sheet1
sham-preHFTS	sham-post	SNI-pre	SNI-post
2.1258	4.0139	3.34433	3.87508
1.1329	1.7782	1.13828	3.24599
3.5236	4.7534	1.61447	3.77487
2.4952	3.9852	1.67024	3.22344
6.0793	7.3229	2.24961	3.93679
4.7613	7.3489	1.97736	3.84021
2.98	1.1734	1.50656	3.67994
3.0546	1.4784	7.5251	5.94517
3.7021	3.2267	9.50708	11.2618
5.7869	1.7118	5.1161	5.61154
5.4266	1.7982	10.6469	11.2195
5.9834	4.2288	7.31225	8.32887
5.7618	5.0934	10.7729	11.5368
4.301	1.9306	10.0395	11.2282
1.8693	1.0028	11.5993	12.0734
2.7557	1.9453	4.65311	6.51618
7.466	3.1771	6.90899	9.24825
4.8214	2.6574	11.1179	12.3114
7.6896	6.3056	3.42309	3.80336
6.7957	2.1799	5.41123	5.97806
3.7079	2.0107	1.386	1.72711
3.4493	1.5496	4.2097	6.17606
5.6982	4.9645	4.61417	5.17847
7.5331	5.8274	5.93175	6.82682
6.2269	3.8784	3.56829	4.02248
2.6287	1.3123	2.66112	3.75912
7.5086	3.3249	8.84292	9.60228
2.4756	2.0689	1.93296	4.04724
13.9288	9.806	10.1495	9.8946
11.1934	5.898	9.89628	9.6708
3.0435	1.9746	8.70516	8.81376
2.9369	2.1361	2.84544	2.75736
1.8251	1.1037	5.09832	5.49744
8.1637	4.7742	2.67924	2.81136
7.146	3.4281	3.63516	3.36612
9.2737	3.9149	7.81344	7.06728
3.8146	2.6134	4.98288	5.13384
8.1439	2.1816	9.8154	10.3463
2.4256	1.0435	7.68492	7.37448
4.8539	2.028	12.3796	11.9557
3.9834	3.1598	3.83244	4.22952
8.0362	6.2712	6.61248	6.22632
4.4626	3.3928	2.77944	2.61696
3.3104	1.0302	5.2506	5.07756
5.4194	2.2474	6.06552	5.6562
4.2029	2.8674	3.291	2.99088
6.0226	2.2265	4.00692	4.0728
2.7292	1.4714	2.49684	1.61184
2.0588	1.6232	2.74704	1.39572
3.4467	2.6168	2.67756	1.32204
7.3114	3.2025	2.05656	1.20108
6.2224	3.7885	2.27088	1.70088
3.5821	1.008	4.69896	2.09316
5.2431	8.3709	10.0717	5.37144
1.7103	3.0416	2.41404	1.21356
6.2051	8.5968	5.87568	2.78952
5.4009	7.147	2.8242	2.24892
4.7019	3.316	6.83844	3.12732
4.9278	3.5506	6.09732	4.5528
7.2762	3.2645	9.59796	8.55888
6.3977	5.227	7.43772	1.93584
6.2825	5.6479	4.68888	3.14268
6.6405	5.9467	2.76912	2.10648
7.8478	7.29	2.92584	1.24764
8.6329	6.2598	4.64052	1.24332
6.397	4.5706	9.42792	4.30572
8.4939	6.2535	7.49088	3.14496
6.1619	2.289	8.86824	2.24448
15.0315	11.4792	3.09864	1.2402
2.4415	2.2227	7.79304	4.65756
10.0419	8.1523	2.538	1.24572
2.1987	1.5478	3.64572	2.19
1.9851	1.8007	5.14488	2.69496
1.5149	1.6928	11.8739	11.4872
6.5349	5.943	6.97008	5.4546
2.9618	2.0074	10.1186	9.2988
3.0324	3.3585	7.07592	5.82204
9.5043	8.6194	4.27212	3.51708
9.0914	8.6546	3.03588	2.634
8.7152	8.4524	9.71772	5.70264
8.707	8.0406	4.5264	3.7572
1.6577	1.3628	8.74032	5.45232
4.4074	4.3037	3.03924	2.04684
3.4421	3.6293	6.62316	3.28236
2.0028	1.985	5.90088	5.19216
2.9528	3.137	12.5796	11.5272
5.4203	5.2651	8.96736	4.2
4.7585	4.6748	4.39368	3.14088
1.7137	1.5671	10.056	7.24476
6.5957	6.8225	5.67564	2.2692
4.117	4.1301	10.0343	9.01404
4.2975	4.9847	10.9387	7.58988
5.4897	5.4935	6.27228	3.13608
		6.33588	4.6854
		8.08008	4.69872
		3.6996	1.77996
		12.5767	9.22548
		11.2566	8.80596
		11.4412	8.06604
		6.36756	4.88916
		12.2152	7.36416
		3.71364	2.349
		4.85328	1.40376
		3.00756	2.22192
		4.46928	2.04384
		9.65616	4.82172
		9.86232	6.53532
		3.12552	1.68456
		4.79364	2.16732
		5.48208	2.7252
		8.56272	5.03172
		4.17876	3.23928
		9.47472	3.82848
		3.77136	2.97288
		5.81424	3.43776
		4.1748	1.67604
		6.34008	4.97244
		2.07696	1.296
		4.25136	2.24244
		4.05144	2.631
		7.95168	6.95988
		4.30572	3.0606
		8.00376	4.71492
