# Supplementary material for: High-frequency terahertz stimulation alleviates neuropathic pain by inhibiting the pyramidal neuron activity in the anterior cingulate cortex of mice
Source: eLife journal article supplement (doi:10.7554/elife.97444), 2024-04-26
Supplement: fig4-data1 [file INT_All.xlsx]

## Sheet: Sheet1
sham-preHFTS	sham-post	SNI-pre	SNI-post
6.6831	12.2081	4.34364	4.75272
6.329	4.3581	2.73228	1.9818
4.4691	1.5173	9.37836	7.2306
5.5341	3.2286	3.0186	1.25592
8.6639	6.6631	13.2446	11.6667
8.6879	1.7775	3.98304	2.95404
4.0082	1.919	4.368	3.31104
5.3991	3.033
4.5392	2.6749
4.9272	3.8315
4.611	4.1621
4.5149	4.1301
3.1019	2.6726
3.825	3.3837
6.697	6.7079
